# Supplementary material for: Annual variations of monsoon and drought detected by GPS: A case study in Yunnan, China
Source: PubMed Central journal article supplement (PMC5517602; doi:10.1038/s41598-017-06095-1), 2017-07-19
Supplement: 41598_2017_6095_MOESM1_ESM.pdf [file 41598_2017_6095_MOESM1_ESM.pdf]

# Supporting Information

## **Annual variations of monsoon and drought detected by GPS: A case study in Yunnan, China**

Weiping Jiang<sup>1</sup> \*, Peng Yuan<sup>1,3</sup>, Hua Chen<sup>2</sup>, Jianqing Cai<sup>3</sup>, Zhao Li<sup>4</sup>, Nengfang Chao<sup>5</sup> and Nico Sneeuw<sup>3</sup>

1 GNSS Research Center, Wuhan University, Wuhan 430079, China

2 School of Geodesy and Geomatics, Wuhan University, Wuhan 430079, China

3 Institute of Geodesy, University of Stuttgart, Stuttgart 70174, Germany

4 Facult é des Sciences, de la Technologie et de la Communication, University of Luxembourg, 6, rue Richard Coudenhove-Kalergi, L-1359 Luxembourg City, Luxembourg

5 MOE Key Laboratory of Fundamental Physical Quantities Measurement, School of Physics, Huazhong University of Science and Technology, Wuhan 430074, China

\* Corresponding author: [wpjiang@whu.edu.cn](mailto:wpjiang@whu.edu.cn)

**Table S1.** GPS station locations and observation epochs used in this study.

| Site | Longitude (°) | Latitude (°) | Height (m) | Duration (yr)   |
|------|---------------|--------------|------------|-----------------|
| KUNM | 102.8         | 25.0         | 1986.2     | 2007.0 – 2013.1 |
| XIAG | 100.3         | 25.6         | 1974.3     | 2007.0 – 2015.0 |
| YNCX | 101.5         | 25.1         | 1785.4     | 2011.0 – 2015.0 |
| YNDC | 103.2         | 26.1         | 1297.6     | 2011.0 – 2015.0 |
| YNHZ | 103.3         | 26.4         | 2263.9     | 2011.0 – 2015.0 |
| YNJD | 100.9         | 24.4         | 1244.6     | 2011.0 – 2015.0 |
| YNJP | 103.2         | 22.8         | 1250.1     | 2011.0 – 2015.0 |
| YNLA | 100.0         | 22.6         | 1107.9     | 2011.0 – 2015.0 |
| YNLC | 100.1         | 23.9         | 1559.5     | 2011.0 – 2015.0 |
| YNLJ | 100.0         | 26.7         | 3195.8     | 2011.0 – 2015.0 |
| YNMH | 100.5         | 22.0         | 1166.3     | 2011.0 – 2014.6 |
| YNMJ | 101.7         | 23.4         | 1281.7     | 2011.0 – 2015.0 |
| YNML | 103.4         | 24.4         | 1520.8     | 2011.0 – 2015.0 |
| YNMZ | 103.4         | 23.4         | 1275.3     | 2011.0 – 2015.0 |
| YNRL | 97.9          | 24.0         | 723.3      | 2011.0 – 2015.0 |
| YNSD | 99.2          | 24.7         | 1478.8     | 2011.0 – 2015.0 |
| YNSM | 101.1         | 22.7         | 1445.4     | 2011.0 – 2015.0 |
| YNTC | 98.4          | 25.0         | 1470.1     | 2011.0 – 2015.0 |
| YNTH | 102.8         | 24.1         | 1778.2     | 2011.0 – 2015.0 |
| YNWS | 104.3         | 23.4         | 1451.6     | 2011.0 – 2015.0 |
| YNXP | 101.9         | 24.1         | 1978.0     | 2011.0 – 2015.0 |
| YNYA | 101.3         | 25.7         | 1846.2     | 2011.0 – 2015.0 |
| YNYL | 99.4          | 25.9         | 1696.3     | 2011.0 – 2015.0 |
| YNYM | 101.9         | 25.7         | 1077.8     | 2011.0 – 2015.0 |
| YNYS | 100.8         | 26.7         | 2143.9     | 2011.0 – 2015.0 |
| YNZD | 99.7          | 27.8         | 3296.9     | 2011.0 – 2015.0 |

**Table S2.** Comparison of the empirical scaling factors of annual amplitudes between GPS-derived VCD with EWH and precipitation.

| VCD                                                                     | EWH            |                | Precipitation  |                |
|-------------------------------------------------------------------------|----------------|----------------|----------------|----------------|
|                                                                         | scaling factor | R <sup>2</sup> | scaling factor | R <sup>2</sup> |
| with ATML correction, Yunnan, present paper                             | 18.1           | 0.62           | 13.3           | 0.38           |
| without ATML correction, Yunnan, present paper                          | 17.0           | 0.68           | 12.4           | 0.32           |
| without ATML correction, the Horn of Africa, Birhanu and Bendick (2015) | 8.6            | 0.76           | 13.8           | 0.64           |

**Table S3.** Comparison of the consistency between GPS-derived and GRACE-derived VCD.

| Region                           | WRMS Reduction<br>(%) | NSE  |
|----------------------------------|-----------------------|------|
| Yunnan, China, present paper     | 44                    | 0.63 |
| Europe, Chen (2015)              | 29                    | 0.47 |
| Amazon, Chen (2015)              | 46                    | 0.64 |
| Nepal, Fu and Freymueller (2012) | 45                    | -    |
| Global, Tesmer et al. (2011)     | 12                    | -    |
